# Supplementary material for: Morphology-controlled assembly and enhanced emission of fluorescence in organic nanospheres and microrods based on 1,2-diphenyl-4-(4-dibenzothienyl)phenyl-1,3-cyclopentadiene
Source: Royal Society of Chemistry journal article supplement (doi:10.1039/c5ce01849h), 2015-01-01
Supplement: c5ce01849h1.pdf [file c5ce01849h1.pdf]

## Supporting Information

### **Morphology-controlled assembly and enhanced emission of fluorescence in organic nanospheres and microrods based on 1,2-diphenyl-4-(4-dibenzothienyl)phenyl)-1,3-cyclopentadiene**

Junwei Ye,<sup>a</sup> Xueming Huang,<sup>a</sup> Yuan Gao,<sup>a</sup> Xiaoxiao Wang,<sup>a</sup> Ting Zheng,<sup>a</sup> Yuan Lin,<sup>a</sup> Xin Liu,<sup>\*,b</sup> and Guiling Ning<sup>\*,a</sup>

<sup>†</sup> State Key Laboratory of Fine Chemicals and School of Chemical Engineering, Dalian University of Technology, 2 Linggong Road, Dalian 116012, P. R. China.

<sup>‡</sup> College of Chemistry, Dalian University of Technology, 2 Linggong Road, Dalian 116012, P. R. China. China.

## Experiments

### Synthesis of 1,2-diphenyl-4-(4-dibenzothiényl)phenyl)-1,3-cyclopentadiene (DPCP)

The synthetic route for DPCP and their chemical structures are shown in Scheme S1. 1,2-diphenyl-4-(4-bromophenyl)-1,3-diene was synthesized according to our previously work. 1,2-diphenyl-4-(4-bromophenyl)-1,3-diene (2.10 mmol) and the 4-dibenzothiénylboronic acid (2.40 mmol) in toluene (15 mL), 2 M aqueous  $K_2CO_3$  solution (10 mL) and ethanol (5 mL) were added. The mixture was stirred for 30 min under an argon atmosphere at room temperature. Then the  $Pd(PPh_3)_4$  catalyst was added and the reaction mixture was stirred at 80 °C for 24 h allowing the temperature to decrease gradually to room temperature. The crude product was concentrated and purified by silica gel column chromatography using petroleum ether/dichloromethane.

$^1H$  NMR (400 MHz,  $CDCl_3$ )  $\delta$ (ppm): 8.23-8.21 (m, 1H), 8.19-8.17 (m, 1H), 7.88-7.86 (m, 1H), 7.79-7.74 (m, 4H), 7.59-7.57 (d, 1H), 7.56-7.54 (m, 1H), 7.51-7.49 (m, 2H), 7.46-7.44 (m, 2H), 7.39-7.34 (m, 5H), 7.32-7.29 (d, 1H), 7.27-7.25 (d, 1H), 7.22-7.21 (d, 1H), 7.16 (s, 1H), 4.04 (s, 2H).  
 $^{13}C$  NMR (100 MHz,  $CDCl_3$ )  $\delta$  (ppm): 144.5, 142.2, 139.7, 139.6, 139.1, 138.5, 137.2, 136.8, 136.7, 136.3, 135.8, 135.4, 132.4, 128.7, 128.6, 128.5, 128.3, 127.8, 127.3, 126.9, 126.8, 126.7, 125.3, 125.2, 124.4, 122.7, 121.8, 120.5, 45.0. MS (API-ES): calcd for  $C_{35}H_{24}S$ , M: 476.2. Elem. Anal.: C, 88.29%; H, 5.16%; S, 6.78%. Found: C, 88.20%; H, 5.08%; S, 6.73%.

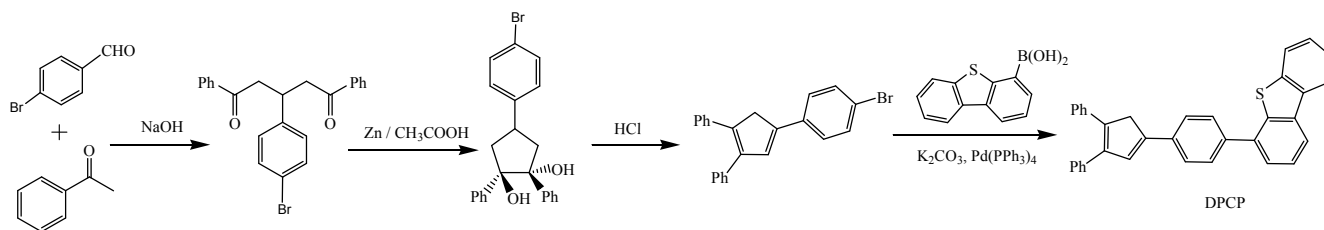

Scheme S1

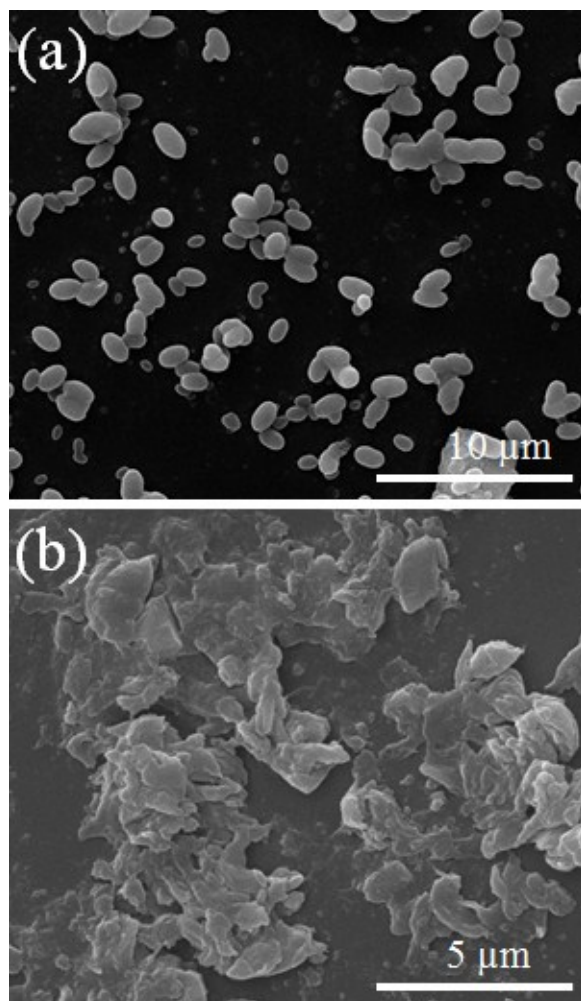

Fig. S1 SEM of DPCP particles obtained by using different solvents (a) ethanol and (b) tetrahydrofuran. Concentration: 0.01 mM.

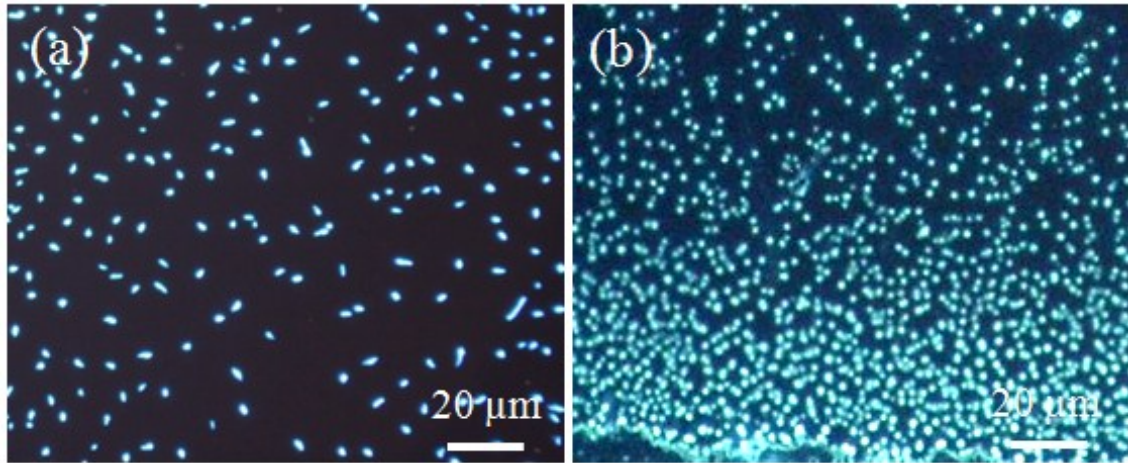

Fig. S2 FM images of DPCP particles prepared by using different surfactants (a) P123 and (b) CTAB.

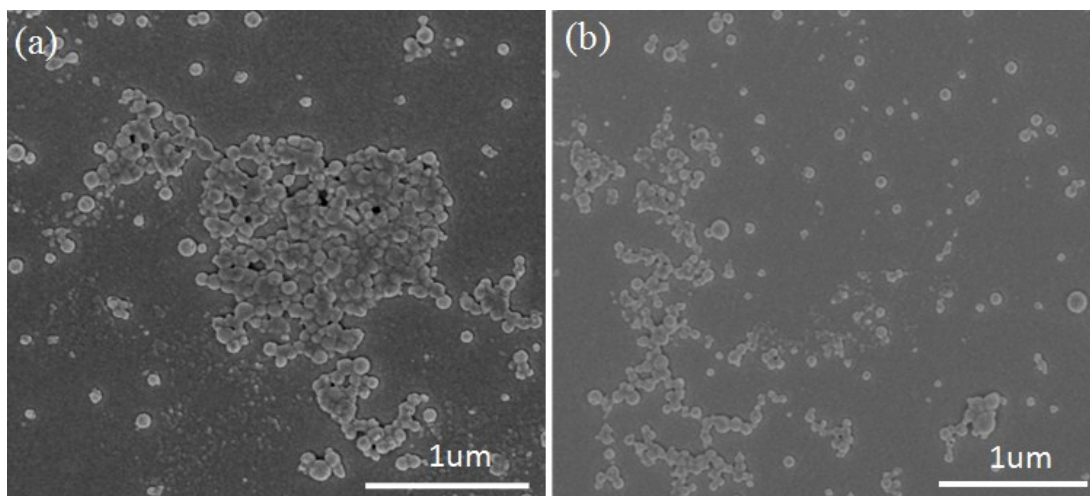

Fig. S3 SEM of DPCP particles obtained by using CTAB with different concentration (a) 0.5 mg/mL, (b) 1 mg/mL.

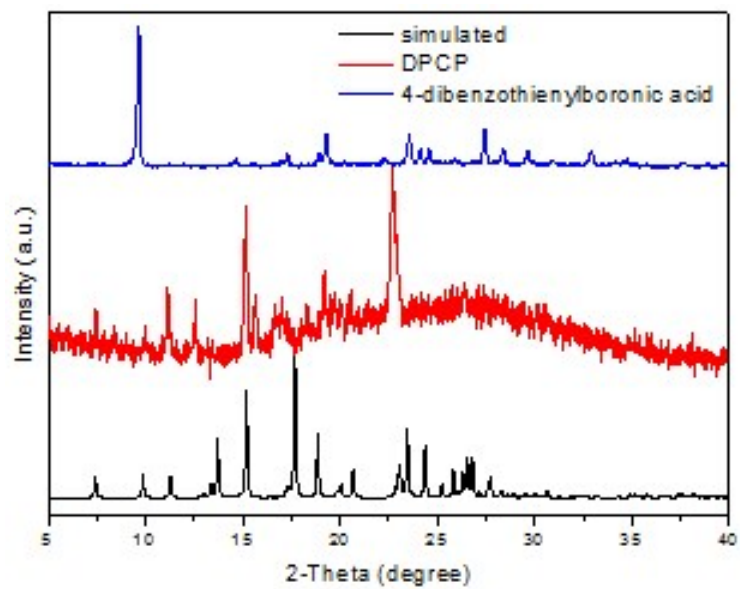

Fig. S4 PXR D patterns of 4-dibenzothienylboronic acid, simulated and experimental DPCP.

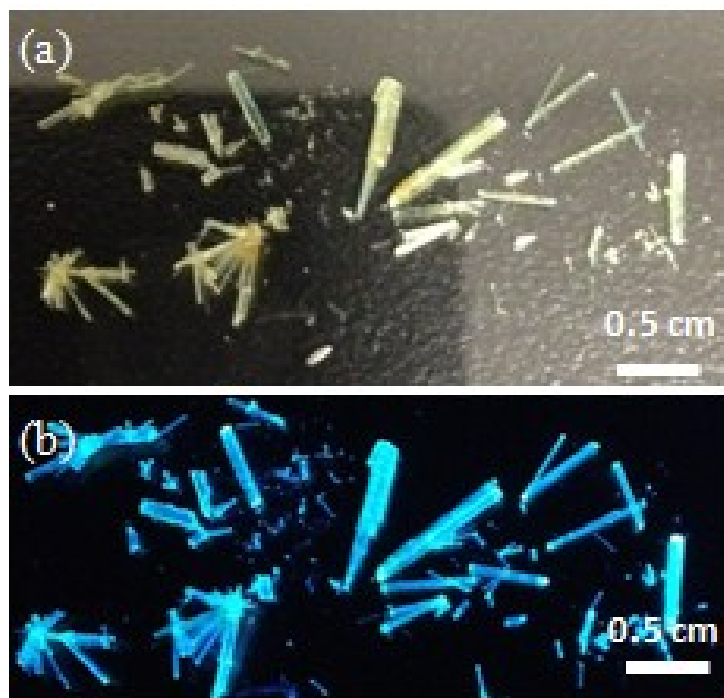

Fig. S5 Crystals of DPCP under sunlight (a) and 365 nm UV irradiation (b).

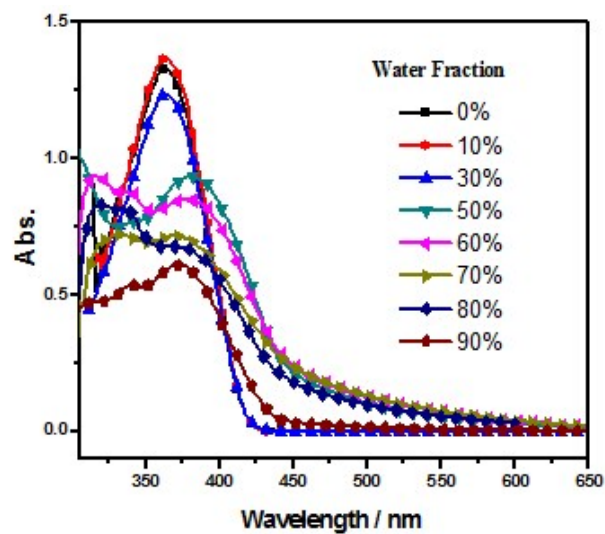

(a)

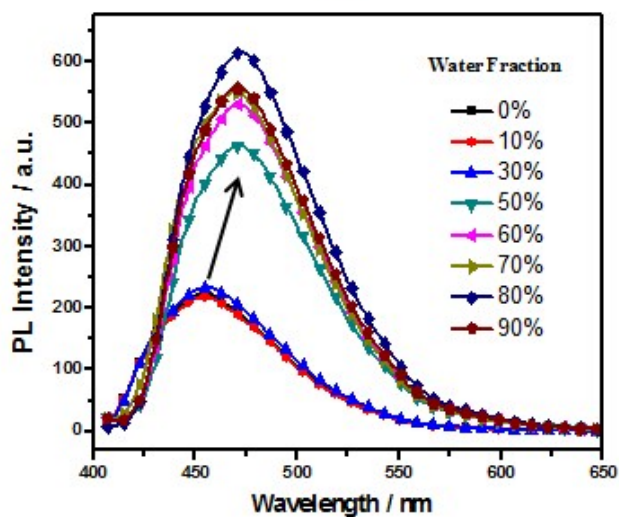

(b)

Fig. S6 UV-vis absorption (a) and photoluminescence spectra of DPCP (b) in water/acetone mixtures with different volume fractions of water. Concentration: 0.05 mM.



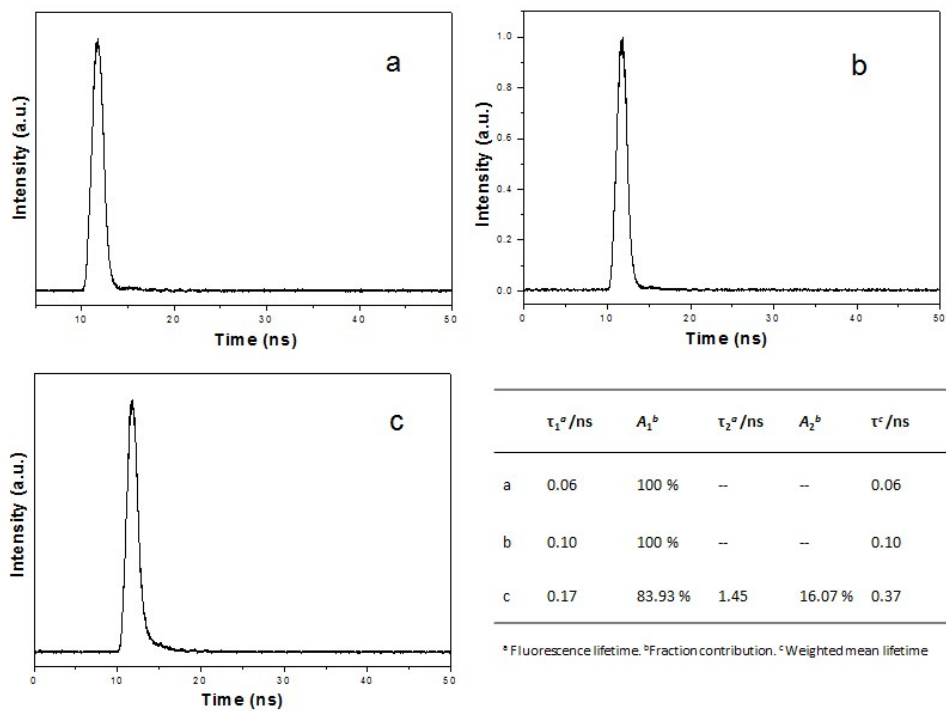

Fig. S7 The fluorescence lifetime curves of DPCP particles in methanol solution (a-b) and methanol/water mixture solution (c).

Table S1. Crystallographic Data and Structure Refinements for **DPCP**

|                                                     |                                   |
|-----------------------------------------------------|-----------------------------------|
| Empirical formula                                   | C <sub>35</sub> H <sub>24</sub> S |
| Formula weight                                      | 476.60                            |
| Crystal system                                      | Orthorhombic                      |
| Space group                                         | <i>Pca2(1)</i>                    |
| <i>a</i> (Å)                                        | 13.805(3)                         |
| <i>b</i> (Å)                                        | 23.501(6)                         |
| <i>c</i> (Å)                                        | 7.6773(18)                        |
| Volume (Å <sup>3</sup> )                            | 2490.7(10)                        |
| <i>Z</i>                                            | 4                                 |
| D <sub>Calc</sub> (mg/m <sup>-3</sup> )             | 1.271                             |
| μ (mm <sup>-1</sup> )                               | 0.152                             |
| F(000)                                              | 1000                              |
| <i>R</i> <sub>int</sub>                             | 0.0513                            |
| GOF on <i>F</i> <sup>2</sup>                        | 1.026                             |
| <i>R</i> <sub>1</sub> [ <i>I</i> >2σ( <i>I</i> )]*  | 0.0527                            |
| <i>wR</i> <sub>2</sub> [ <i>I</i> >2σ( <i>I</i> )]* | 0.1051                            |
| <i>R</i> <sub>1</sub> (all data) *                  | 0.0916                            |
| <i>wR</i> <sub>2</sub> (all data)*                  | 0.1178                            |

Table S2 Selected bond lengths [ $\text{\AA}$ ] and angles [ $^\circ$ ] for **DPCP**.

|             |          |                 |          |
|-------------|----------|-----------------|----------|
| C(1)-C(2)   | 1.372(4) | C(28)-C(29)     | 1.411(4) |
| C(1)-C(6)   | 1.461(4) | C(28)-C(30)     | 1.449(4) |
| C(1)-C(5)   | 1.486(4) | C(29)-S(1)      | 1.747(3) |
| C(2)-C(3)   | 1.470(4) | C(30)-C(35)     | 1.398(4) |
| C(2)-C(12)  | 1.491(3) | C(30)-C(31)     | 1.404(4) |
| C(3)-C(4)   | 1.407(3) | C(31)-C(32)     | 1.357(5) |
| C(4)-C(5)   | 1.445(4) | C(32)-C(33)     | 1.384(5) |
| C(4)-C(18)  | 1.469(4) | C(33)-C(34)     | 1.403(5) |
| C(6)-C(7)   | 1.395(4) | C(34)-C(35)     | 1.375(4) |
| C(6)-C(11)  | 1.396(4) | C(35)-S(1)      | 1.760(3) |
| C(7)-C(8)   | 1.380(4) | C(2)-C(1)-C(6)  | 130.4(3) |
| C(8)-C(9)   | 1.354(5) | C(2)-C(1)-C(5)  | 107.6(3) |
| C(9)-C(10)  | 1.375(5) | C(6)-C(1)-C(5)  | 122.0(2) |
| C(10)-C(11) | 1.383(5) | C(1)-C(2)-C(3)  | 109.1(2) |
| C(12)-C(17) | 1.384(4) | C(1)-C(2)-C(12) | 128.6(3) |
| C(12)-C(13) | 1.394(4) | C(3)-C(2)-C(12) | 122.3(2) |
| C(13)-C(14) | 1.367(4) | C(4)-C(3)-C(2)  | 108.3(3) |
| C(14)-C(15) | 1.374(5) | C(3)-C(4)-C(5)  | 107.7(3) |
| C(15)-C(16) | 1.372(5) | C(3)-C(4)-C(18) | 128.0(3) |
| C(16)-C(17) | 1.387(4) | C(5)-C(4)-C(18) | 124.3(2) |
| C(18)-C(23) | 1.380(4) | C(4)-C(5)-C(1)  | 107.3(2) |
| C(18)-C(19) | 1.401(4) | C(7)-C(6)-C(11) | 116.9(3) |
| C(19)-C(20) | 1.370(4) | C(7)-C(6)-C(1)  | 120.8(3) |
| C(20)-C(21) | 1.393(4) | C(11)-C(6)-C(1) | 122.3(3) |
| C(21)-C(22) | 1.389(4) | C(8)-C(7)-C(6)  | 121.3(3) |
| C(21)-C(24) | 1.485(4) | C(9)-C(8)-C(7)  | 121.0(3) |

|                   |          |                   |           |
|-------------------|----------|-------------------|-----------|
| C(22)-C(23)       | 1.378(4) | C(8)-C(9)-C(10)   | 119.1(3)  |
| C(24)-C(25)       | 1.392(4) | C(9)-C(10)-C(11)  | 120.9(3)  |
| C(24)-C(29)       | 1.400(4) | C(10)-C(11)-C(6)  | 120.7(3)  |
| C(25)-C(26)       | 1.389(5) | C(17)-C(12)-C(13) | 117.8(3)  |
| C(26)-C(27)       | 1.365(4) | C(17)-C(12)-C(2)  | 122.0(3)  |
| C(27)-C(28)       | 1.386(5) | C(13)-C(12)-C(2)  | 120.1(3)  |
| C(14)-C(13)-C(12) | 121.0(3) | C(27)-C(26)-C(25) | 120.8(4)  |
| C(13)-C(14)-C(15) | 120.8(3) | C(26)-C(27)-C(28) | 119.4(3)  |
| C(16)-C(15)-C(14) | 119.2(3) | C(27)-C(28)-C(29) | 120.2(3)  |
| C(15)-C(16)-C(17) | 120.5(3) | C(27)-C(28)-C(30) | 128.5(3)  |
| C(12)-C(17)-C(16) | 120.7(3) | C(29)-C(28)-C(30) | 111.4(3)  |
| C(23)-C(18)-C(19) | 116.4(3) | C(24)-C(29)-C(28) | 120.7(3)  |
| C(23)-C(18)-C(4)  | 120.4(3) | C(24)-C(29)-S(1)  | 126.8(2)  |
| C(19)-C(18)-C(4)  | 123.1(2) | C(28)-C(29)-S(1)  | 112.5(2)  |
| C(20)-C(19)-C(18) | 121.7(3) | C(35)-C(30)-C(31) | 118.3(3)  |
| C(19)-C(20)-C(21) | 121.8(3) | C(35)-C(30)-C(28) | 112.9(3)  |
| C(22)-C(21)-C(20) | 116.2(3) | C(31)-C(30)-C(28) | 128.6(3)  |
| C(22)-C(21)-C(24) | 122.1(2) | C(32)-C(31)-C(30) | 119.4(4)  |
| C(20)-C(21)-C(24) | 121.6(3) | C(31)-C(32)-C(33) | 121.8(3)  |
| C(23)-C(22)-C(21) | 121.9(3) | C(32)-C(33)-C(34) | 120.4(3)  |
| C(22)-C(23)-C(18) | 121.8(3) | C(35)-C(34)-C(33) | 117.3(4)  |
| C(25)-C(24)-C(29) | 117.2(3) | C(34)-C(35)-C(30) | 122.7(3)  |
| C(25)-C(24)-C(21) | 118.8(3) | C(34)-C(35)-S(1)  | 125.5(3)  |
| C(29)-C(24)-C(21) | 124.1(3) | C(30)-C(35)-S(1)  | 111.7(2)  |
| C(26)-C(25)-C(24) | 121.8(3) | C(29)-S(1)-C(35)  | 91.37(15) |
